# Supplementary material
Source: Springer Nature journal article supplement (https://www.springermedizin.de/resource/supplementary/12959_2008_101_MOESM4_ESM.pdf/9569598)

**A** Epinephrine 10  $\mu\text{M}$ 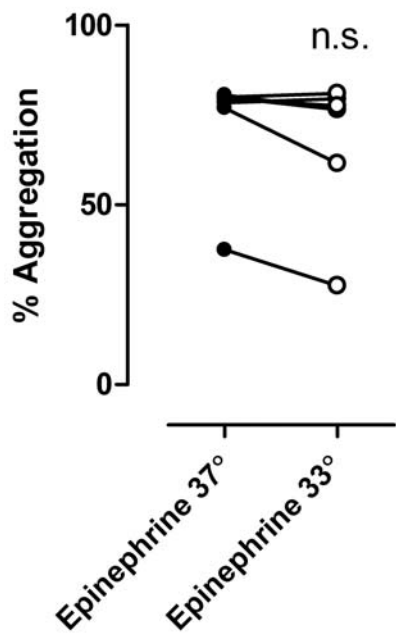**B** Epinephrine 10  $\mu\text{M}$ 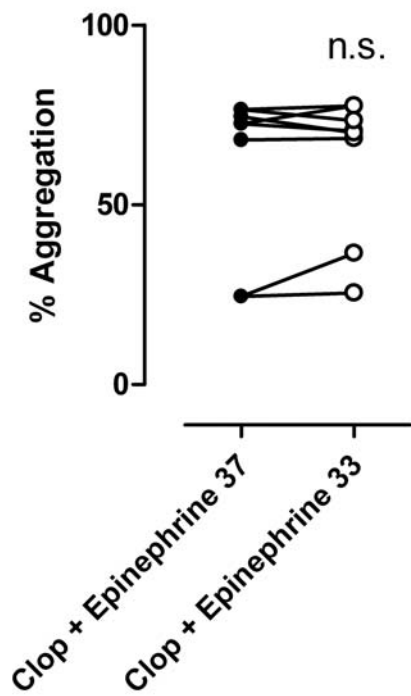**C** U46619 10  $\mu\text{M}$ 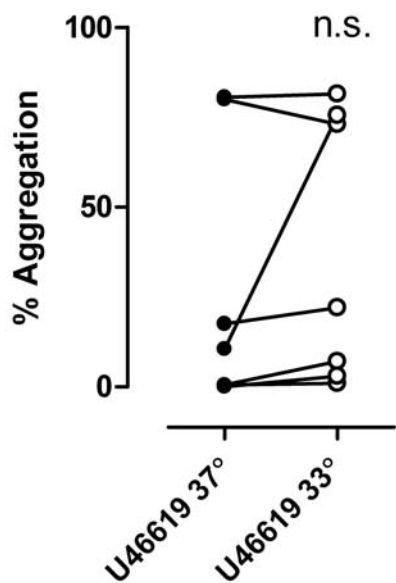**D** U46619 10  $\mu\text{M}$ 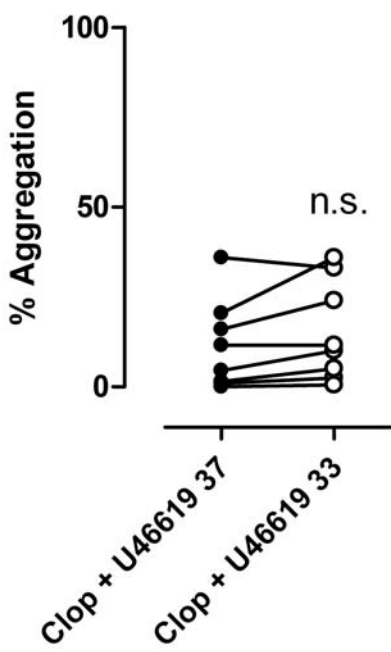

Supplement: MOESM4 [file 9569598]
